# Supplementary material for: Biological role and clinical value of miR‐99a‐5p in head and neck squamous cell carcinoma (HNSCC): A bioinformatics‐based study
Source: PubMed Central journal article supplement (PMC6070648; doi:10.1002/2211-5463.12478), 2018-06-26

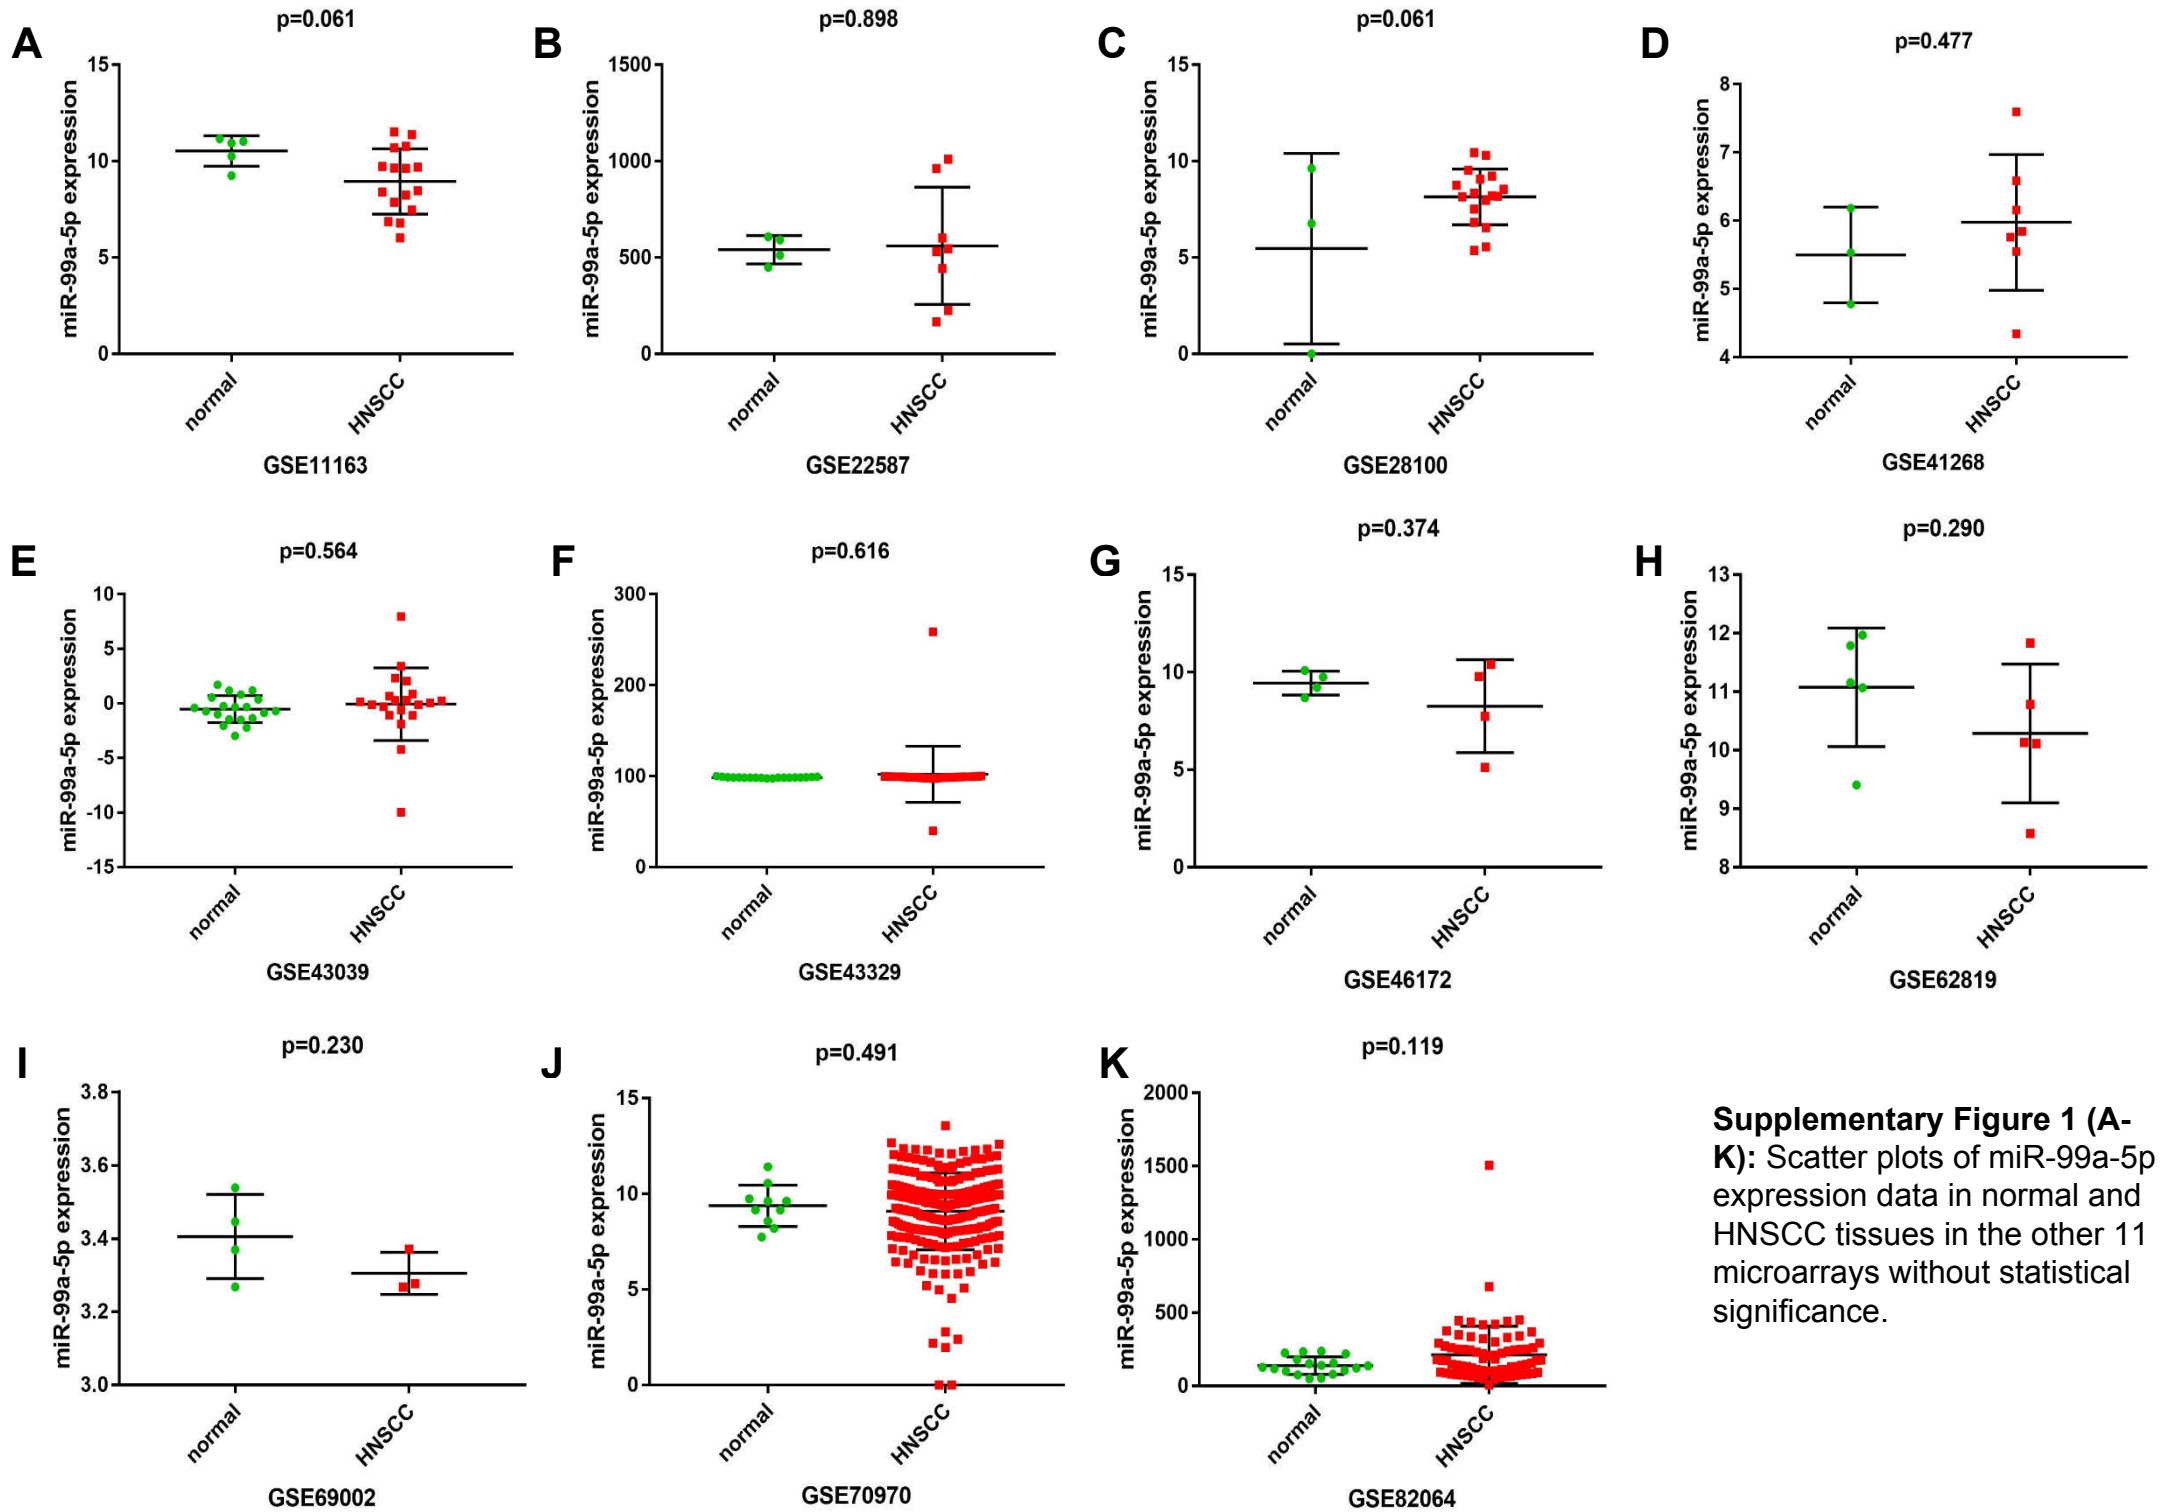

**Supplementary Figure 1 (A-K):** Scatter plots of miR-99a-5p expression data in normal and HNSCC tissues in the other 11 microarrays without statistical significance.

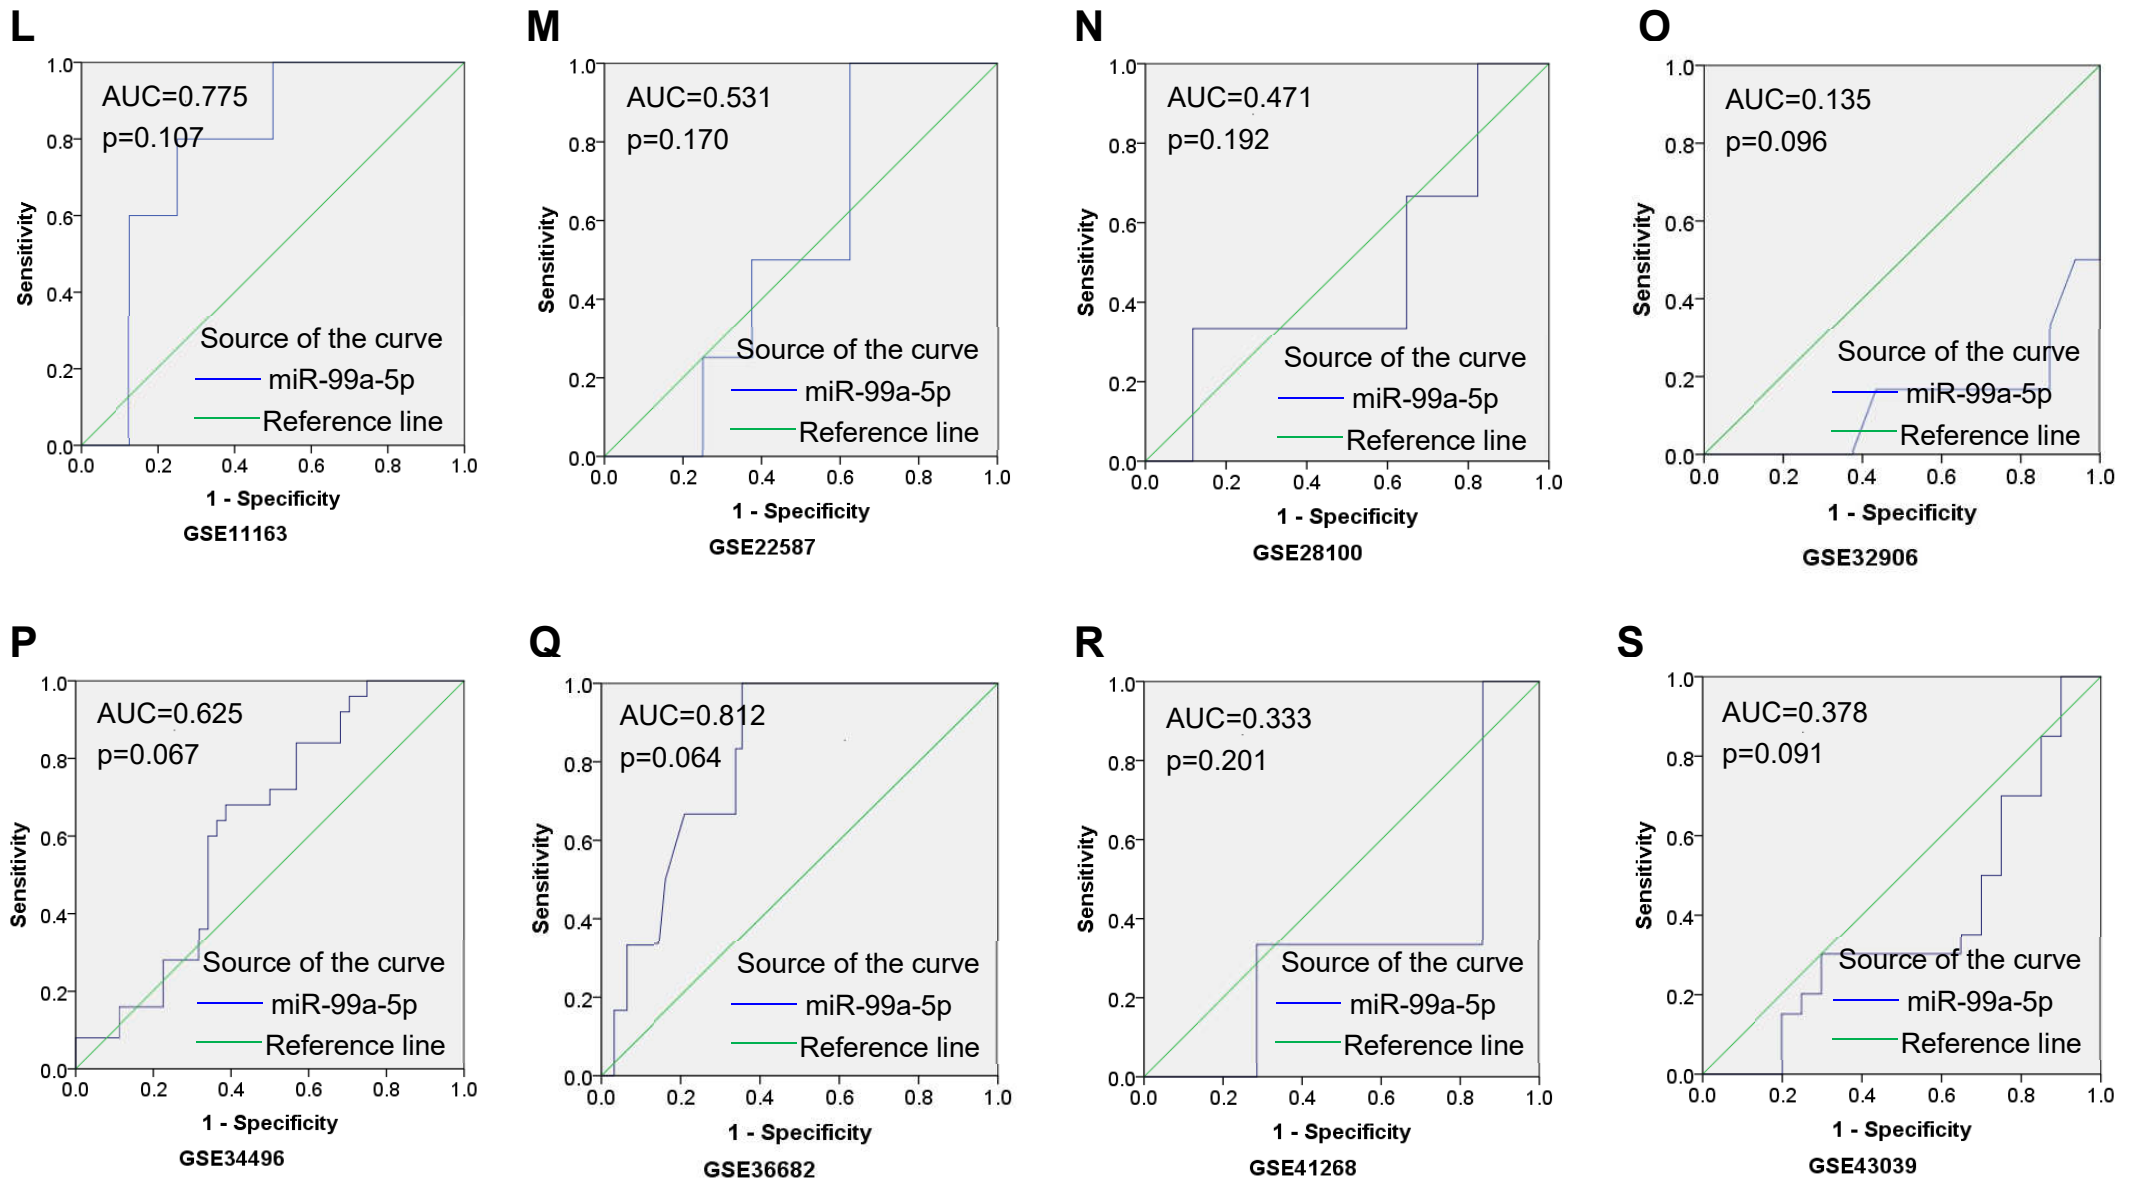

**Supplementary Figure 1 (L-X):** ROC curves of the other 13 microarrays without statistical significance.

**T**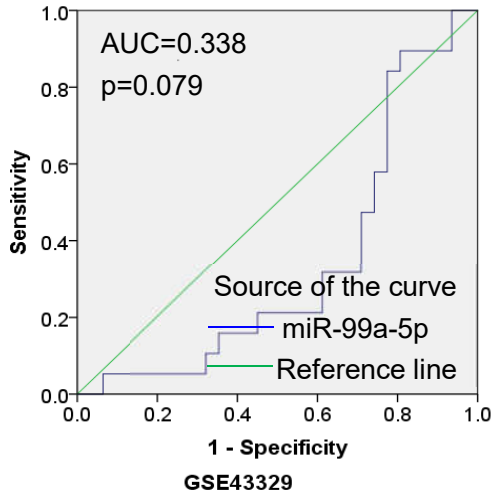**U**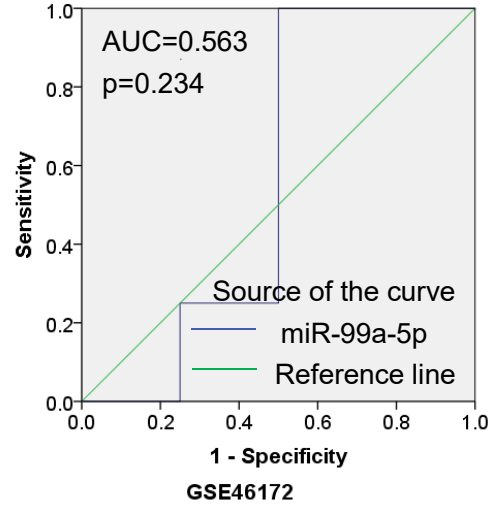**V**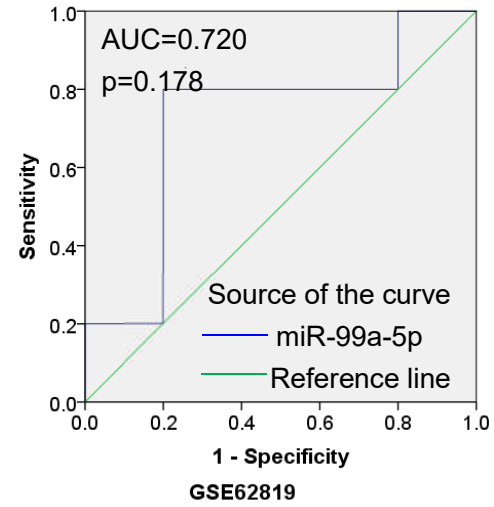**W**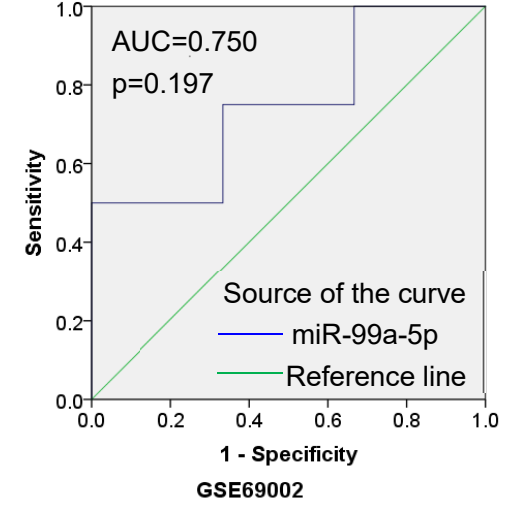**X**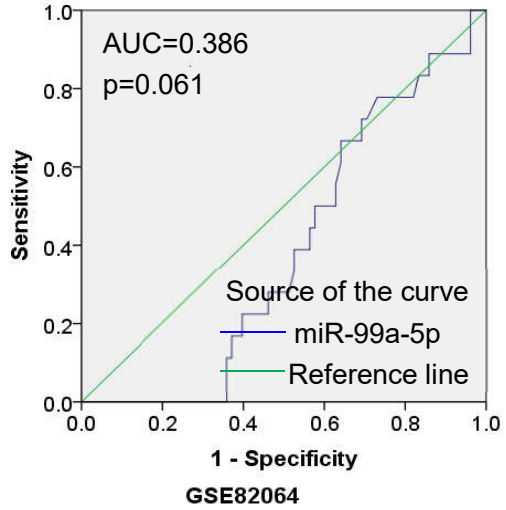

Supplement: FEB4-8-1280-s001.pdf [file FEB4-8-1280-s001.pdf]
